# Supplementary material for: Tromethamine improves mucociliary clearance in cystic fibrosis pigs
Source: PubMed Central journal article supplement (PMC9453173; doi:10.14814/phy2.15340), 2022-09-08

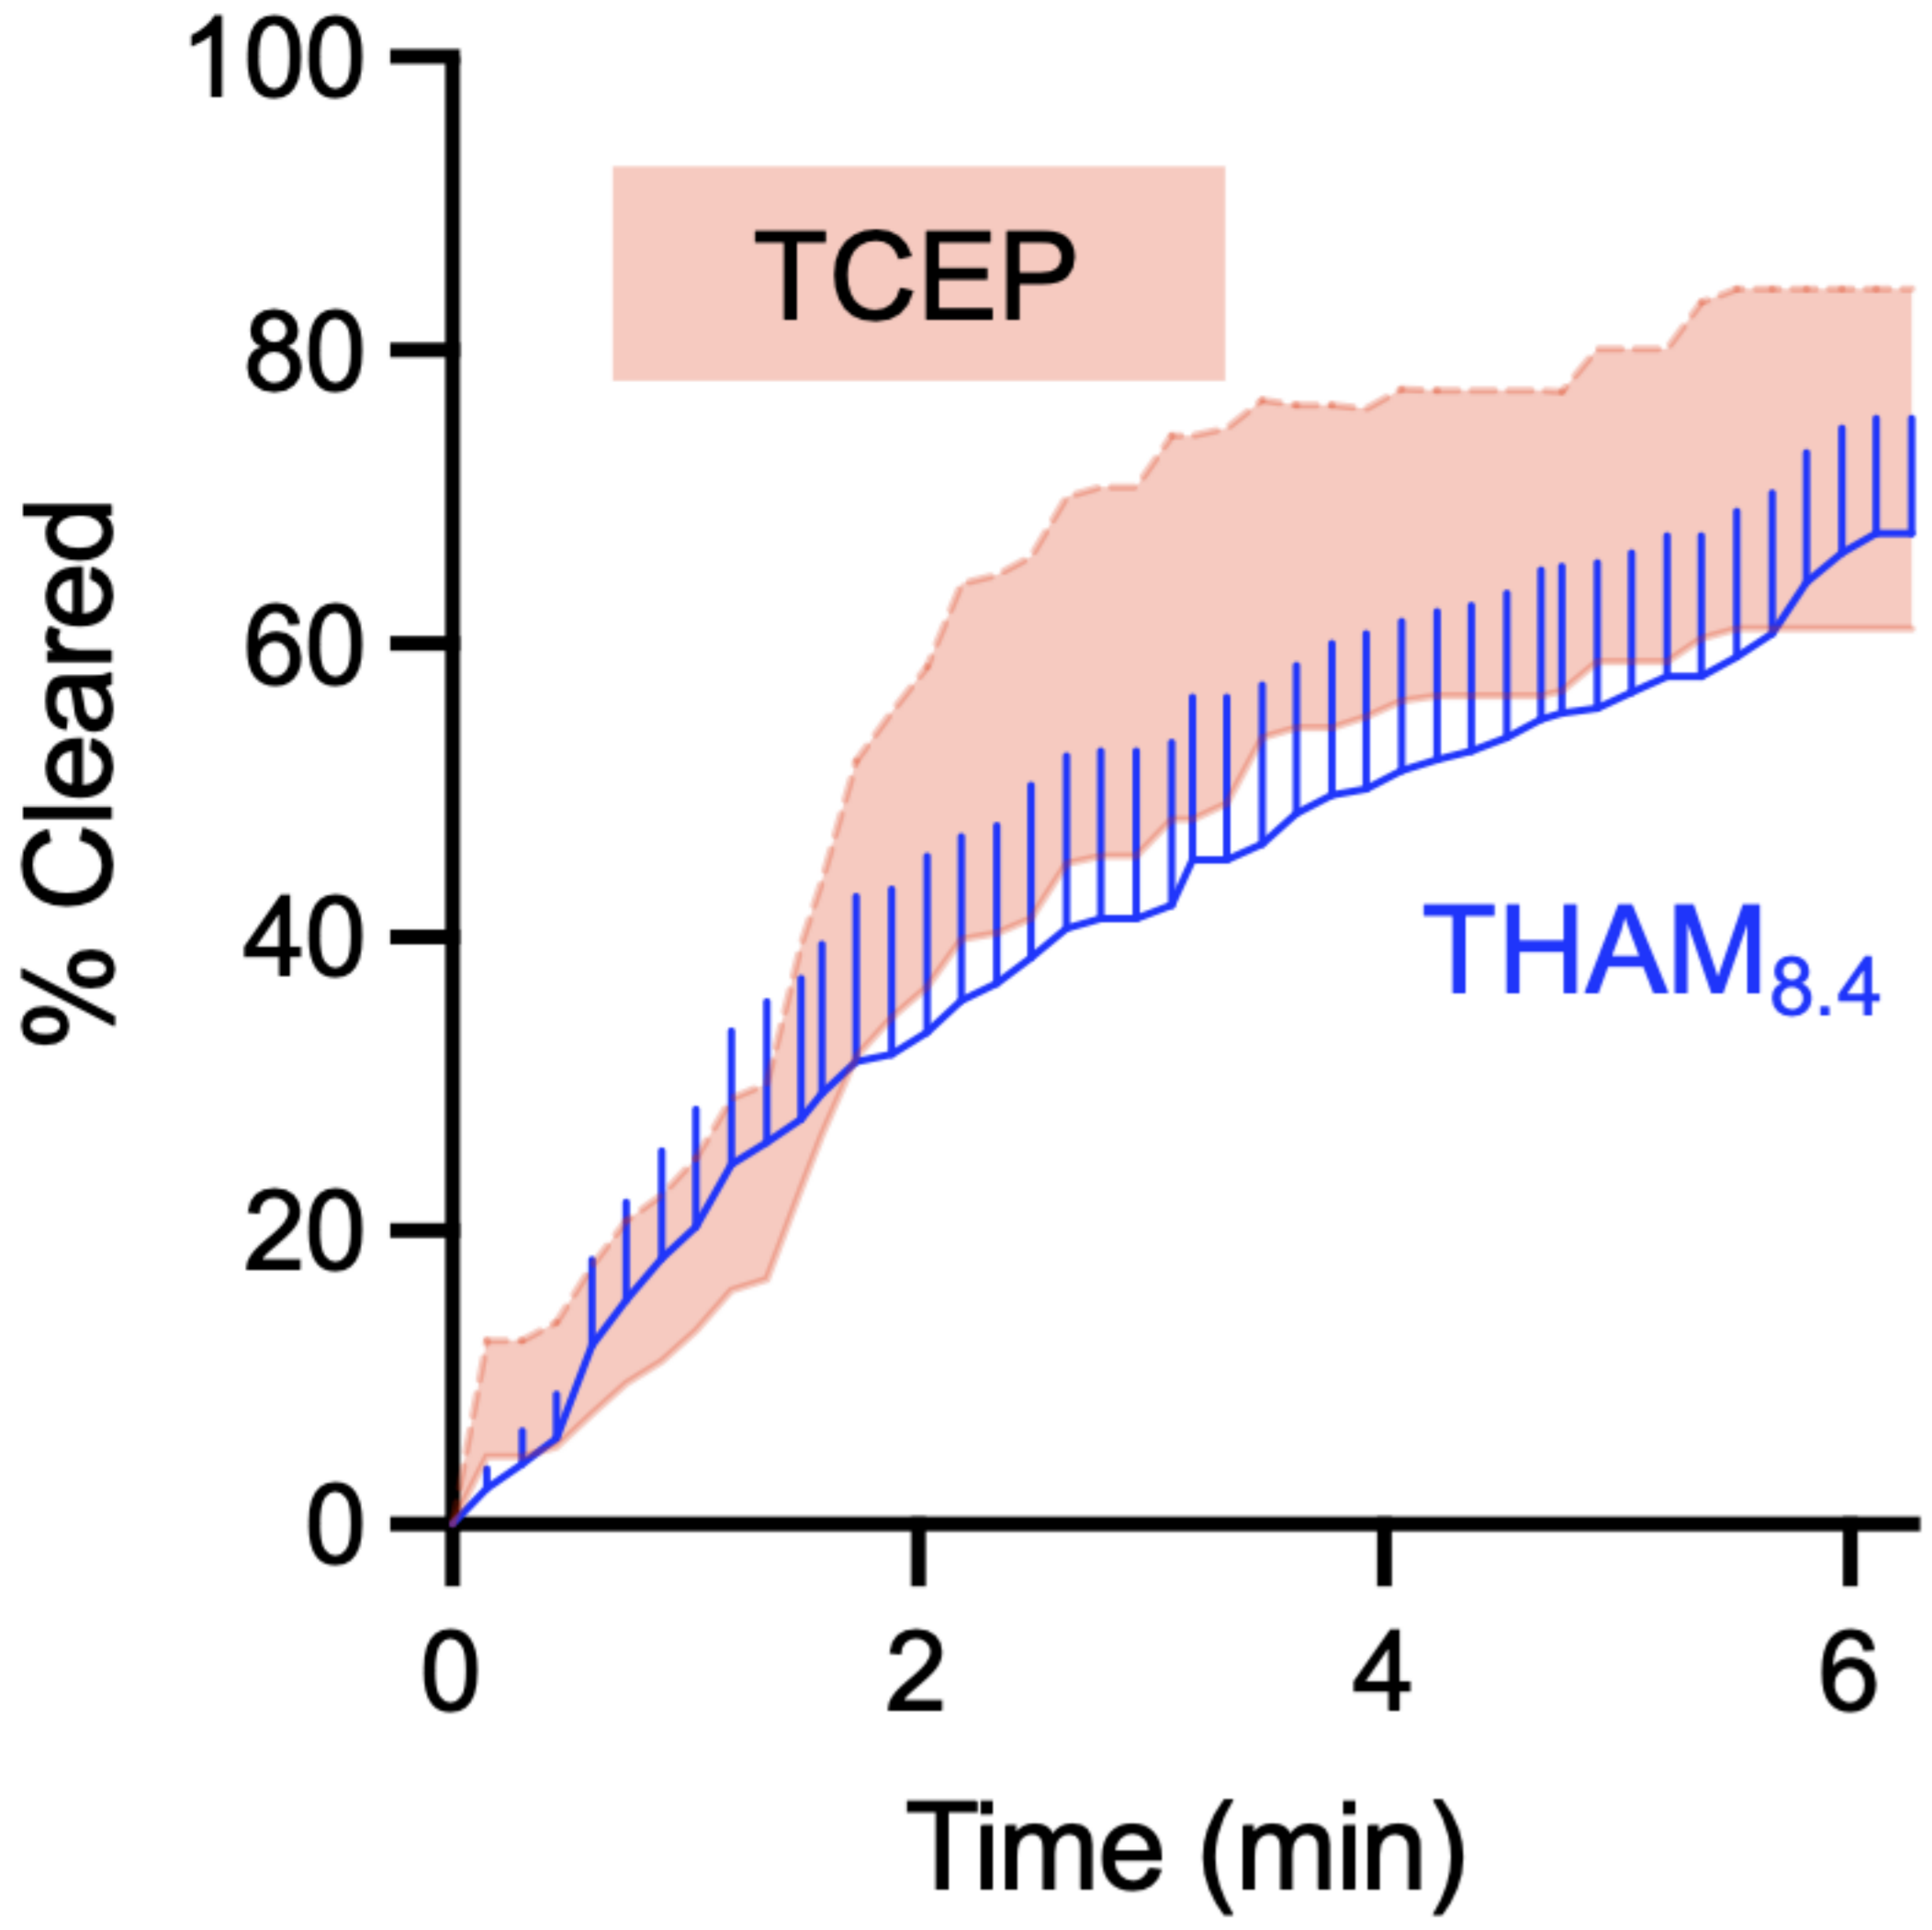

Supplement: PHY2-10-e15340-s002.pdf [file PHY2-10-e15340-s002.pdf]
